# Supplementary material
Source: HighWire-hosted journal article supplement (https://gut.bmj.com/highwire/filestream/192786/field_highwire_adjunct_files/1/58121612webonlydata2.xls)
Supplement: 58121612webonlydata2.xls [file 58121612webonlydata2.xls]

## Sheet: Blad1
UC cohort A (R=8/NR=16)						UC cohort B (R=12/NR=10)						Cohort A and cohort B combined (R=20/NR=26)
Probe Set ID	Gene Symbol	Gene Title	Fold Change (R/NR)	FDR		Probe Set ID	Gene Symbol	Gene Title	Fold Change (R/NR)	FDR		Probe Set ID	Gene Symbol	Gene Title	Fold Change (R/NR)	FDR
206172_at	IL13RA2	interleukin 13 receptor, alpha 2	0.222584	0.0138747		204933_s_at	TNFRSF11B	tumor necrosis factor receptor superfamily, member 11b (osteoprotegerin)	0.232304	0.00158878		204933_s_at	TNFRSF11B	tumor necrosis factor receptor superfamily, member 11b (osteoprotegerin)	0.279494	9.06226e-07
210895_s_at	CD86	CD86 molecule	0.424172	0.0263582		230746_s_at	STC1	Stanniocalcin 1	0.21291	0.00158878		230746_s_at	STC1	Stanniocalcin 1	0.18257	1.41535e-05
206953_s_at	LPHN2	latrophilin 2	0.42356	0.0263582		205220_at	GPR109B	G protein-coupled receptor 109B	0.0765004	0.00158878		1554997_a_at	PTGS2	prostaglandin-endoperoxide synthase 2 (prostaglandin G/H synthase and cyclooxygenase)	0.163282	3.25842e-05
211671_s_at	NR3C1	nuclear receptor subfamily 3, group C, member 1 (glucocorticoid receptor)	0.421626	0.0263582		203591_s_at	CSF3R	colony stimulating factor 3 receptor (granulocyte)	0.16244	0.00158878		227140_at	---	---	0.166773	3.70644e-05
213338_at	TMEM158	transmembrane protein 158	0.411522	0.0263582		205067_at	IL1B	interleukin 1, beta	0.202505	0.00158878		206172_at	IL13RA2	interleukin 13 receptor, alpha 2	0.223885	3.70644e-05
201865_x_at	NR3C1	nuclear receptor subfamily 3, group C, member 1 (glucocorticoid receptor)	0.487941	0.0263582		39402_at	IL1B	interleukin 1, beta	0.216568	0.00158878		206924_at	IL11	interleukin 11	0.149259	3.91251e-05
204933_s_at	TNFRSF11B	tumor necrosis factor receptor superfamily, member 11b (osteoprotegerin)	0.320389	0.0263582		1553297_a_at	CSF3R	colony stimulating factor 3 receptor (granulocyte)	0.217143	0.00158878		204595_s_at	STC1	stanniocalcin 1	0.324084	3.91251e-05
209070_s_at	RGS5	regulator of G-protein signaling 5	0.405843	0.0263582		243296_at	---	---	0.173191	0.00158878		204932_at	TNFRSF11B	tumor necrosis factor receptor superfamily, member 11b (osteoprotegerin)	0.282262	3.91251e-05
209795_at	CD69	CD69 molecule	0.311374	0.0263582		232224_at	MASP1	mannan-binding lectin serine peptidase 1 (C4/C2 activating component of Ra-reactive factor)	0.337557	0.00158878		205990_s_at	WNT5A	wingless-type MMTV integration site family, member 5A	0.316821	4.01891e-05
207610_s_at	EMR2	egf-like module containing, mucin-like, hormone receptor-like 2	0.398255	0.0263582		204748_at	PTGS2	prostaglandin-endoperoxide synthase 2 (prostaglandin G/H synthase and cyclooxygenase)	0.13298	0.00158878		224940_s_at	PAPPA	pregnancy-associated plasma protein A, pappalysin 1	0.385854	4.09369e-05
228314_at	---	---	0.388682	0.0263582		213524_s_at	G0S2	G0/G1switch 2	0.168892	0.00158878		204597_x_at	STC1	stanniocalcin 1	0.280724	4.99055e-05
212526_at	SPG20	spastic paraplegia 20 (Troyer syndrome)	0.435091	0.0263582		204596_s_at	STC1	stanniocalcin 1	0.387468	0.00158878		231227_at	WNT5A	wingless-type MMTV integration site family, member 5A	0.3161	4.99055e-05
211959_at	IGFBP5	insulin-like growth factor binding protein 5	0.282143	0.0263582		207008_at	IL8RB	interleukin 8 receptor, beta	0.139691	0.00158878		210511_s_at	INHBA	inhibin, beta A	0.243711	6.49866e-05
203424_s_at	IGFBP5	insulin-like growth factor binding protein 5	0.447144	0.0263582		230170_at	OSM	oncostatin M	0.168366	0.00158878		204748_at	PTGS2	prostaglandin-endoperoxide synthase 2 (prostaglandin G/H synthase and cyclooxygenase)	0.188192	6.49866e-05
232297_at	---	---	0.440782	0.0263582		205568_at	AQP9	aquaporin 9	0.141054	0.00158878		229947_at	PI15	peptidase inhibitor 15	0.106363	6.49866e-05
231227_at	WNT5A	wingless-type MMTV integration site family, member 5A	0.247631	0.0263582		204924_at	TLR2	toll-like receptor 2	0.313467	0.00158878		210664_s_at	TFPI	tissue factor pathway inhibitor (lipoprotein-associated coagulation inhibitor)	0.475075	6.49866e-05
218854_at	DSE	dermatan sulfate epimerase	0.427868	0.0263582		204597_x_at	STC1	stanniocalcin 1	0.243277	0.00158878		204596_s_at	STC1	stanniocalcin 1	0.427824	8.72401e-05
202422_s_at	ACSL4	acyl-CoA synthetase long-chain family member 4	0.302424	0.0263582		204595_s_at	STC1	stanniocalcin 1	0.277461	0.00158878		227697_at	SOCS3	suppressor of cytokine signaling 3	0.348535	0.000112108
204597_x_at	STC1	stanniocalcin 1	0.256868	0.0263582		210873_x_at	APOBEC3A	apolipoprotein B mRNA editing enzyme, catalytic polypeptide-like 3A	0.130476	0.00158878		205207_at	IL6	interleukin 6 (interferon, beta 2)	0.206622	0.000124531
203603_s_at	ZEB2	zinc finger E-box binding homeobox 2	0.368863	0.0263582		205119_s_at	FPR1	formyl peptide receptor 1	0.198185	0.00158878		214974_x_at	CXCL5	chemokine (C-X-C motif) ligand 5	0.146291	0.000164032
206336_at	CXCL6	chemokine (C-X-C motif) ligand 6 (granulocyte chemotactic protein 2)	0.218871	0.0263582		210119_at	KCNJ15	potassium inwardly-rectifying channel, subfamily J, member 15	0.156995	0.00158878		206569_at	IL24	interleukin 24	0.251816	0.000191024
209868_s_at	RBMS1	RNA binding motif, single stranded interacting protein 1	0.422946	0.0263582		1554997_a_at	PTGS2	prostaglandin-endoperoxide synthase 2 (prostaglandin G/H synthase and cyclooxygenase)	0.119125	0.00164457		206025_s_at	TNFAIP6	tumor necrosis factor, alpha-induced protein 6	0.210432	0.000202978
227361_at	---	---	0.332989	0.0263582		212942_s_at	KIAA1199	KIAA1199	0.180524	0.00164457		206211_at	SELE	selectin E (endothelial adhesion molecule 1)	0.235359	0.000202978
204273_at	EDNRB	endothelin receptor type B	0.357109	0.0263582		214511_x_at	FCGR1B	Fc fragment of IgG, high affinity Ib, receptor (CD64)	0.249423	0.00216528		210873_x_at	APOBEC3A	apolipoprotein B mRNA editing enzyme, catalytic polypeptide-like 3A	0.232083	0.000202978
205680_at	MMP10	matrix metallopeptidase 10 (stromelysin 2)	0.268338	0.0276622		203140_at	BCL6	B-cell CLL/lymphoma 6 (zinc finger protein 51)	0.29804	0.00242561		229435_at	GLIS3	GLIS family zinc finger 3	0.414265	0.000206352
205990_s_at	WNT5A	wingless-type MMTV integration site family, member 5A	0.282542	0.0286363		204932_at	TNFRSF11B	tumor necrosis factor receptor superfamily, member 11b (osteoprotegerin)	0.243147	0.00242561		201645_at	TNC	tenascin C (hexabrachion)	0.290444	0.000213904
227140_at	---	---	0.157664	0.0286363		220088_at	C5AR1	complement component 5a receptor 1	0.247768	0.00242561		205828_at	MMP3	matrix metallopeptidase 3 (stromelysin 1, progelatinase)	0.276972	0.000297575
201645_at	TNC	tenascin C (hexabrachion)	0.224316	0.0286363		217167_x_at	GK	glycerol kinase	0.441422	0.00258511		212942_s_at	KIAA1199	KIAA1199	0.261793	0.000301549
224940_s_at	PAPPA	pregnancy-associated plasma protein A, pappalysin 1	0.386577	0.028921		210163_at	CXCL11	chemokine (C-X-C motif) ligand 11	0.191143	0.00261377		213425_at	WNT5A	wingless-type MMTV integration site family, member 5A	0.343397	0.000301549
203065_s_at	CAV1	caveolin 1, caveolae protein, 22kDa	0.401177	0.028921		210664_s_at	TFPI	tissue factor pathway inhibitor (lipoprotein-associated coagulation inhibitor)	0.445834	0.00261377		217966_s_at	FAM129A	family with sequence similarity 129, member A	0.444821	0.000301549
212977_at	CXCR7	chemokine (C-X-C motif) receptor 7	0.40392	0.028921		205234_at	SLC16A4	solute carrier family 16, member 4 (monocarboxylic acid transporter 5)	0.444783	0.0029004		224941_at	PAPPA	pregnancy-associated plasma protein A, pappalysin 1	0.421159	0.000301549
227295_at	IKIP	IKK interacting protein	0.441742	0.028921		212657_s_at	IL1RN	interleukin 1 receptor antagonist	0.215122	0.0029004		229450_at	IFIT3	interferon-induced protein with tetratricopeptide repeats 3	0.438694	0.000343263
214247_s_at	DKK3	dickkopf homolog 3 (Xenopus laevis)	0.382436	0.0305045		210773_s_at	FPR2	formyl peptide receptor 2	0.185881	0.00297109		211506_s_at	IL8	interleukin 8	0.211618	0.000353032
212154_at	SDC2	syndecan 2	0.43268	0.0305045		206025_s_at	TNFAIP6	tumor necrosis factor, alpha-induced protein 6	0.157253	0.00297109		215101_s_at	CXCL5	chemokine (C-X-C motif) ligand 5	0.143967	0.000353032
209960_at	---	---	0.424254	0.0305045		212281_s_at	TMEM97	transmembrane protein 97	2.04284	0.00307164		209821_at	IL33	interleukin 33	0.460548	0.000418517
204932_at	TNFRSF11B	tumor necrosis factor receptor superfamily, member 11b (osteoprotegerin)	0.282518	0.0305045		213131_at	OLFM1	olfactomedin 1	0.401233	0.00307547		243296_at	---	---	0.29955	0.000418517
206924_at	IL11	interleukin 11	0.133562	0.0305045		211100_x_at	LILRA2	leukocyte immunoglobulin-like receptor, subfamily A (with TM domain), member 2	0.462173	0.00325195		231766_s_at	COL12A1	collagen, type XII, alpha 1	0.326512	0.000418517
226001_at	KLHL5	kelch-like 5 (Drosophila)	0.390742	0.0305045		222934_s_at	CLEC4E	C-type lectin domain family 4, member E	0.280992	0.00326659		219825_at	CYP26B1	cytochrome P450, family 26, subfamily B, polypeptide 1	0.302961	0.000447642
203434_s_at	MME	membrane metallo-endopeptidase	0.325155	0.0305045		206211_at	SELE	selectin E (endothelial adhesion molecule 1)	0.171765	0.00332073		202422_s_at	ACSL4	acyl-CoA synthetase long-chain family member 4	0.360022	0.000453445
209071_s_at	RGS5	regulator of G-protein signaling 5	0.456249	0.0305045		201963_at	ACSL1	acyl-CoA synthetase long-chain family member 1	0.220689	0.00332073		220122_at	MCTP1	multiple C2 domains, transmembrane 1	0.462698	0.000453445
1554741_s_at	FGF7 /// KGFLP1 /// KGFLP2	fibroblast growth factor 7 (keratinocyte growth factor) /// keratinocyte growth factor-like protein 1 /// keratinocyte growth factor-like protein 2	0.326654	0.0305045		219434_at	TREM1	triggering receptor expressed on myeloid cells 1	0.169178	0.00334401		205798_at	IL7R	interleukin 7 receptor	0.465684	0.000469584
220330_s_at	SAMSN1	SAM domain, SH3 domain and nuclear localization signals 1	0.345753	0.0305045		204006_s_at	FCGR3A /// FCGR3B	Fc fragment of IgG, low affinity IIIa, receptor (CD16a) /// Fc fragment of IgG, low affinity IIIb, receptor (CD16b)	0.178833	0.00334401		204105_s_at	NRCAM	neuronal cell adhesion molecule	0.458164	0.000499353
227565_at	---	---	0.481942	0.0305947		206026_s_at	TNFAIP6	tumor necrosis factor, alpha-induced protein 6	0.149965	0.00334401		242388_x_at	---	---	0.416927	0.000507201
227266_s_at	FYB	FYN binding protein (FYB-120/130)	0.43382	0.0305947		206881_s_at	LILRA3	leukocyte immunoglobulin-like receptor, subfamily A (without TM domain), member 3	0.46463	0.00369908		213338_at	TMEM158	transmembrane protein 158	0.499632	0.000524893
210511_s_at	INHBA	inhibin, beta A	0.23304	0.030908		206569_at	IL24	interleukin 24	0.215056	0.00369908		209960_at	---	---	0.467662	0.000539453
210146_x_at	LILRB2	leukocyte immunoglobulin-like receptor, subfamily B (with TM and ITIM domains), member 2	0.325729	0.030908		221345_at	FFAR2	free fatty acid receptor 2	0.173649	0.00369908		202859_x_at	IL8	interleukin 8	0.306833	0.000547152
232231_at	RUNX2	runt-related transcription factor 2	0.428445	0.030908		205207_at	IL6	interleukin 6 (interferon, beta 2)	0.17311	0.00369908		229802_at	---	---	0.33481	0.000547152
206584_at	LY96	lymphocyte antigen 96	0.383026	0.030908		210511_s_at	INHBA	inhibin, beta A	0.21552	0.00369908		203140_at	BCL6	B-cell CLL/lymphoma 6 (zinc finger protein 51)	0.431485	0.000547152
207173_x_at	CDH11	cadherin 11, type 2, OB-cadherin (osteoblast)	0.397121	0.0310809		205237_at	FCN1	ficolin (collagen/fibrinogen domain containing) 1	0.222338	0.00369908		207008_at	IL8RB	interleukin 8 receptor, beta	0.260412	0.000596171
203561_at	FCGR2A	Fc fragment of IgG, low affinity IIa, receptor (CD32)	0.392223	0.0310809		205990_s_at	WNT5A	wingless-type MMTV integration site family, member 5A	0.320336	0.00369908		226757_at	IFIT2	interferon-induced protein with tetratricopeptide repeats 2	0.420096	0.000601
217967_s_at	FAM129A	family with sequence similarity 129, member A	0.360487	0.0310809		204959_at	MNDA	myeloid cell nuclear differentiation antigen	0.166563	0.00369908		204457_s_at	GAS1	growth arrest-specific 1	0.195785	0.000621022
225710_at	GNB4	guanine nucleotide binding protein (G protein), beta polypeptide 4	0.475111	0.0310809		210772_at	FPR2	formyl peptide receptor 2	0.199263	0.00369908		206026_s_at	TNFAIP6	tumor necrosis factor, alpha-induced protein 6	0.221949	0.000686009
209474_s_at	ENTPD1	ectonucleoside triphosphate diphosphohydrolase 1	0.392142	0.0310809		212659_s_at	IL1RN	interleukin 1 receptor antagonist	0.30393	0.00369908		202628_s_at	SERPINE1	serpin peptidase inhibitor, clade E (nexin, plasminogen activator inhibitor type 1), member 1	0.362814	0.000689577
1555229_a_at	C1S	complement component 1, s subcomponent	0.284839	0.0310809		207275_s_at	ACSL1	acyl-CoA synthetase long-chain family member 1	0.213482	0.00369908		236439_at	---	---	0.313796	0.000689577
213194_at	ROBO1	roundabout, axon guidance receptor, homolog 1 (Drosophila)	0.425879	0.0310809		232629_at	PROK2	prokineticin 2	0.111	0.00369908		209955_s_at	FAP	fibroblast activation protein, alpha	0.453839	0.000701619
1555638_a_at	SAMSN1	SAM domain, SH3 domain and nuclear localization signals 1	0.382378	0.0310809		216243_s_at	IL1RN	interleukin 1 receptor antagonist	0.220365	0.00369908		1555167_s_at	NAMPT	nicotinamide phosphoribosyltransferase	0.447604	0.000704663
207691_x_at	ENTPD1	ectonucleoside triphosphate diphosphohydrolase 1	0.400716	0.0310809		225987_at	STEAP4	STEAP family member 4	0.268115	0.00369908		229723_at	TAGAP	T-cell activation RhoGTPase activating protein	0.316639	0.000720065
229723_at	TAGAP	T-cell activation RhoGTPase activating protein	0.303537	0.0310809		219825_at	CYP26B1	cytochrome P450, family 26, subfamily B, polypeptide 1	0.215763	0.00390829		213524_s_at	G0S2	G0/G1switch 2	0.298694	0.000720508
211668_s_at	PLAU	plasminogen activator, urokinase	0.372989	0.0310809		228758_at	BCL6	B-cell CLL/lymphoma 6 (zinc finger protein 51)	0.277039	0.00416076		232629_at	PROK2	prokineticin 2	0.21415	0.000721021
230746_s_at	STC1	Stanniocalcin 1	0.192595	0.031101		211506_s_at	IL8	interleukin 8	0.130626	0.00416076		210118_s_at	IL1A	interleukin 1, alpha	0.341509	0.000727238
209524_at	HDGFRP3	hepatoma-derived growth factor, related protein 3	0.467243	0.0334107		209395_at	CHI3L1	chitinase 3-like 1 (cartilage glycoprotein-39)	0.203137	0.00416076		209278_s_at	TFPI2	tissue factor pathway inhibitor 2	0.193121	0.000810801
203708_at	PDE4B	phosphodiesterase 4B, cAMP-specific (phosphodiesterase E4 dunce homolog, Drosophila)	0.407046	0.0334418		213943_at	TWIST1	twist homolog 1 (acrocephalosyndactyly 3; Saethre-Chotzen syndrome) (Drosophila)	0.361448	0.00416076		219434_at	TREM1	triggering receptor expressed on myeloid cells 1	0.315599	0.000868356
1555725_a_at	RGS5	regulator of G-protein signaling 5	0.417402	0.0336372		220005_at	P2RY13	purinergic receptor P2Y, G-protein coupled, 13	0.347472	0.00416076		213943_at	TWIST1	twist homolog 1 (acrocephalosyndactyly 3; Saethre-Chotzen syndrome) (Drosophila)	0.390491	0.000922664
209278_s_at	TFPI2	tissue factor pathway inhibitor 2	0.164322	0.0337974		207857_at	LILRA2	leukocyte immunoglobulin-like receptor, subfamily A (with TM domain), member 2	0.333383	0.00416076		205568_at	AQP9	aquaporin 9	0.280646	0.000926955
205479_s_at	PLAU	plasminogen activator, urokinase	0.41082	0.0337974		215977_x_at	GK	glycerol kinase	0.419607	0.00416076		205404_at	HSD11B1	hydroxysteroid (11-beta) dehydrogenase 1	0.486366	0.000929981
242388_x_at	---	---	0.418144	0.0337974		211163_s_at	TNFRSF10C	tumor necrosis factor receptor superfamily, member 10c, decoy without an intracellular domain	0.25615	0.00416076		202627_s_at	SERPINE1	serpin peptidase inhibitor, clade E (nexin, plasminogen activator inhibitor type 1), member 1	0.413812	0.000929981
203535_at	S100A9	S100 calcium binding protein A9	0.394679	0.0337974		220404_at	GPR97	G protein-coupled receptor 97	0.376952	0.00417936		222934_s_at	CLEC4E	C-type lectin domain family 4, member E	0.43646	0.000940315
218943_s_at	DDX58	DEAD (Asp-Glu-Ala-Asp) box polypeptide 58	0.499154	0.0337974		207387_s_at	GK	glycerol kinase	0.340852	0.00430765		215223_s_at	SOD2	superoxide dismutase 2, mitochondrial	0.477242	0.00095958
206420_at	IGSF6	immunoglobulin superfamily, member 6	0.476143	0.0337974		238581_at	GBP5	guanylate binding protein 5	0.265019	0.00430765		210163_at	CXCL11	chemokine (C-X-C motif) ligand 11	0.265935	0.000967853
212158_at	SDC2	syndecan 2	0.45221	0.0337974		222218_s_at	PILRA	paired immunoglobin-like type 2 receptor alpha	0.450126	0.00431073		230170_at	OSM	oncostatin M	0.312686	0.0009698
220014_at	PRR16	proline rich 16	0.38699	0.0337974		203508_at	TNFRSF1B	tumor necrosis factor receptor superfamily, member 1B	0.44747	0.00448389		238581_at	GBP5	guanylate binding protein 5	0.362546	0.000998822
215646_s_at	VCAN	versican	0.361228	0.0337974		209396_s_at	CHI3L1	chitinase 3-like 1 (cartilage glycoprotein-39)	0.207912	0.00450713		203434_s_at	MME	membrane metallo-endopeptidase	0.397236	0.00101391
203887_s_at	THBD	thrombomodulin	0.473129	0.0337974		204007_at	FCGR3B	Fc fragment of IgG, low affinity IIIb, receptor (CD16b)	0.193637	0.00450713		226237_at	---	---	0.370291	0.00101391
205828_at	MMP3	matrix metallopeptidase 3 (stromelysin 1, progelatinase)	0.252	0.0337974		117_at	HSPA6	heat shock 70kDa protein 6 (HSP70B')	0.457187	0.00452951		236495_at	---	---	0.318001	0.00101391
213425_at	WNT5A	wingless-type MMTV integration site family, member 5A	0.31178	0.0343646		201041_s_at	DUSP1	dual specificity phosphatase 1	0.434159	0.00452951		205220_at	GPR109B	G protein-coupled receptor 109B	0.199527	0.00101623
227099_s_at	LOC387763	hypothetical LOC387763	0.374225	0.0345803		217763_s_at	RAB31	RAB31, member RAS oncogene family	0.477044	0.00452951		205114_s_at	CCL3 /// CCL3L1 /// CCL3L3 /// LOC728830	chemokine (C-C motif) ligand 3 /// chemokine (C-C motif) ligand 3-like 1 /// chemokine (C-C motif) ligand 3-like 3 /// similar to C-C motif chemokine 3-like 1 precursor (Small-inducible cytokine A3-like 1) (Tonsillar lymphocyte LD78 beta protein) (LD78-beta(1-70)) (G0/G1 switch regulatory protein 19-2) (G0S19-2 protein) (PAT 464.2)	0.282375	0.00109643
1554997_a_at	PTGS2	prostaglandin-endoperoxide synthase 2 (prostaglandin G/H synthase and cyclooxygenase)	0.21103	0.0345803		207072_at	IL18RAP	interleukin 18 receptor accessory protein	0.300175	0.00456684		228128_x_at	PAPPA	pregnancy-associated plasma protein A, pappalysin 1	0.394754	0.00109643
204222_s_at	GLIPR1	GLI pathogenesis-related 1 (glioma)	0.420879	0.0345803		229560_at	TLR8	toll-like receptor 8	0.316732	0.00471214		210119_at	KCNJ15	potassium inwardly-rectifying channel, subfamily J, member 15	0.304723	0.00109743
203324_s_at	CAV2	caveolin 2	0.409648	0.0345803		206359_at	SOCS3	suppressor of cytokine signaling 3	0.422914	0.0047798		225987_at	STEAP4	STEAP family member 4	0.405751	0.00109743
223809_at	RGS18	regulator of G-protein signaling 18	0.458345	0.0345803		205404_at	HSD11B1	hydroxysteroid (11-beta) dehydrogenase 1	0.364701	0.004914		231879_at	COL12A1	collagen, type XII, alpha 1	0.411077	0.0011177
226136_at	GLIPR1	GLI pathogenesis-related 1 (glioma)	0.4672	0.0345803		218660_at	DYSF	dysferlin, limb girdle muscular dystrophy 2B (autosomal recessive)	0.487913	0.0050051		226847_at	---	---	0.402665	0.00112068
203504_s_at	ABCA1	ATP-binding cassette, sub-family A (ABC1), member 1	0.495918	0.0345803		204457_s_at	GAS1	growth arrest-specific 1	0.144403	0.00513995		206953_s_at	LPHN2	latrophilin 2	0.489658	0.00112481
204595_s_at	STC1	stanniocalcin 1	0.347881	0.0345803		205922_at	VNN2	vanin 2	0.212728	0.00516618		211122_s_at	CXCL11	chemokine (C-X-C motif) ligand 11	0.277581	0.00118057
212097_at	CAV1	caveolin 1, caveolae protein, 22kDa	0.442537	0.0345803		227140_at	---	---	0.173518	0.0052515		227361_at	---	---	0.445705	0.00118057
201860_s_at	PLAT	plasminogen activator, tissue	0.499447	0.0345803		229934_at	---	---	0.293474	0.00525895		39402_at	IL1B	interleukin 1, beta	0.354245	0.00121603
218871_x_at	CSGALNACT2	chondroitin sulfate N-acetylgalactosaminyltransferase 2	0.492303	0.0345803		229947_at	PI15	peptidase inhibitor 15	0.0851609	0.00538679		212657_s_at	IL1RN	interleukin 1 receptor antagonist	0.359528	0.00124877
212265_at	QKI	quaking homolog, KH domain RNA binding (mouse)	0.461099	0.0345803		207094_at	IL8RA	interleukin 8 receptor, alpha	0.489588	0.00539692		211302_s_at	PDE4B	phosphodiesterase 4B, cAMP-specific (phosphodiesterase E4 dunce homolog, Drosophila)	0.402294	0.00126896
215127_s_at	RBMS1	RNA binding motif, single stranded interacting protein 1	0.498925	0.034647		214370_at	S100A8	S100 calcium binding protein A8	0.229189	0.00539692		205067_at	IL1B	interleukin 1, beta	0.336693	0.00126896
218404_at	SNX10	sorting nexin 10	0.493143	0.0348197		206222_at	TNFRSF10C	tumor necrosis factor receptor superfamily, member 10c, decoy without an intracellular domain	0.378891	0.00551024		225681_at	CTHRC1	collagen triple helix repeat containing 1	0.344623	0.00128383
227727_at	MRGPRF	MAS-related GPR, member F	0.49952	0.0350318		227697_at	SOCS3	suppressor of cytokine signaling 3	0.285208	0.00553695		204924_at	TLR2	toll-like receptor 2	0.466383	0.00129117
211302_s_at	PDE4B	phosphodiesterase 4B, cAMP-specific (phosphodiesterase E4 dunce homolog, Drosophila)	0.437345	0.0353551		201858_s_at	SRGN	serglycin	0.359717	0.00553695		226517_at	BCAT1	branched chain aminotransferase 1, cytosolic	0.440371	0.00146807
222235_s_at	CSGALNACT2	chondroitin sulfate N-acetylgalactosaminyltransferase 2	0.454643	0.0359233		224341_x_at	TLR4	toll-like receptor 4	0.393409	0.00553695		206420_at	IGSF6	immunoglobulin superfamily, member 6	0.450962	0.00147906
228128_x_at	PAPPA	pregnancy-associated plasma protein A, pappalysin 1	0.354976	0.0363131		209949_at	NCF2	neutrophil cytosolic factor 2 (65kDa, chronic granulomatous disease, autosomal 2)	0.297482	0.00553695		205099_s_at	CCR1	chemokine (C-C motif) receptor 1	0.496939	0.00147906
214777_at	IGKV4-1	immunoglobulin kappa variable 4-1	0.294526	0.0367348		216950_s_at	FCGR1A	Fc fragment of IgG, high affinity Ia, receptor (CD64)	0.380614	0.00553695		232224_at	MASP1	mannan-binding lectin serine peptidase 1 (C4/C2 activating component of Ra-reactive factor)	0.449038	0.00147925
212263_at	QKI	quaking homolog, KH domain RNA binding (mouse)	0.448917	0.0367348		229723_at	TAGAP	T-cell activation RhoGTPase activating protein	0.240774	0.00553695		207387_s_at	GK	glycerol kinase	0.447469	0.00147925
216321_s_at	NR3C1	nuclear receptor subfamily 3, group C, member 1 (glucocorticoid receptor)	0.470974	0.0367348		214637_at	OSM	oncostatin M	0.322862	0.00553695		207610_s_at	EMR2	egf-like module containing, mucin-like, hormone receptor-like 2	0.439114	0.00149283
221898_at	PDPN	podoplanin	0.455717	0.0367348		206924_at	IL11	interleukin 11	0.172975	0.00573242		238429_at	TMEM71	transmembrane protein 71	0.460782	0.00149283
205419_at	EBI2	Epstein-Barr virus induced gene 2 (lymphocyte-specific G protein-coupled receptor)	0.364524	0.0371141		201743_at	CD14	CD14 molecule	0.48474	0.00573242		225285_at	BCAT1	branched chain aminotransferase 1, cytosolic	0.490826	0.00149283
202498_s_at	SLC2A3	solute carrier family 2 (facilitated glucose transporter), member 3	0.406485	0.0371141		204994_at	MX2	myxovirus (influenza virus) resistance 2 (mouse)	0.442935	0.00575235		206336_at	CXCL6	chemokine (C-X-C motif) ligand 6 (granulocyte chemotactic protein 2)	0.269543	0.00150512
206701_x_at	EDNRB	endothelin receptor type B	0.46752	0.0371141		222939_s_at	SLC16A10	solute carrier family 16, member 10 (aromatic amino acid transporter)	0.431722	0.00575235		207442_at	CSF3	colony stimulating factor 3 (granulocyte)	0.491876	0.00152007
204797_s_at	EML1	echinoderm microtubule associated protein like 1	0.46549	0.0374501		1569095_at	LOC731424	hypothetical protein LOC731424	0.494418	0.00575235		215078_at	SOD2	superoxide dismutase 2, mitochondrial	0.322903	0.00165499
224964_s_at	GNG2	guanine nucleotide binding protein (G protein), gamma 2	0.480362	0.0374501		204232_at	FCER1G	Fc fragment of IgE, high affinity I, receptor for; gamma polypeptide	0.425484	0.00582749		205767_at	EREG	epiregulin	0.34337	0.00168285
225481_at	FRMD6	FERM domain containing 6	0.470241	0.0374501		204105_s_at	NRCAM	neuronal cell adhesion molecule	0.378163	0.00585162		203708_at	PDE4B	phosphodiesterase 4B, cAMP-specific (phosphodiesterase E4 dunce homolog, Drosophila)	0.41285	0.00170805
205306_x_at	KMO	kynurenine 3-monooxygenase (kynurenine 3-hydroxylase)	0.492743	0.0376795		215966_x_at	GK3P	glycerol kinase 3 pseudogene	0.43501	0.00585162		210772_at	FPR2	formyl peptide receptor 2	0.339954	0.00170805
210176_at	TLR1	toll-like receptor 1	0.413447	0.0376795		202644_s_at	TNFAIP3	tumor necrosis factor, alpha-induced protein 3	0.478575	0.00589907		207072_at	IL18RAP	interleukin 18 receptor accessory protein	0.447485	0.0017379
226682_at	LOC283666	hypothetical LOC283666	0.488267	0.0378384		210367_s_at	PTGES	prostaglandin E synthase	0.428634	0.00595449		229560_at	TLR8	toll-like receptor 8	0.417086	0.0017379
219947_at	CLEC4A	C-type lectin domain family 4, member A	0.48518	0.0378384		205114_s_at	CCL3 /// CCL3L1 /// CCL3L3 /// LOC728830	chemokine (C-C motif) ligand 3 /// chemokine (C-C motif) ligand 3-like 1 /// chemokine (C-C motif) ligand 3-like 3 /// similar to C-C motif chemokine 3-like 1 precursor (Small-inducible cytokine A3-like 1) (Tonsillar lymphocyte LD78 beta protein) (LD78-beta(1-70)) (G0/G1 switch regulatory protein 19-2) (G0S19-2 protein) (PAT 464.2)	0.210952	0.00595449		201963_at	ACSL1	acyl-CoA synthetase long-chain family member 1	0.383137	0.00174001
229802_at	---	---	0.330833	0.0378384		211806_s_at	KCNJ15	potassium inwardly-rectifying channel, subfamily J, member 15	0.367038	0.00595449		202760_s_at	PALM2-AKAP2	PALM2-AKAP2	0.497435	0.00176505
205798_at	IL7R	interleukin 7 receptor	0.446539	0.0379875		213425_at	WNT5A	wingless-type MMTV integration site family, member 5A	0.320188	0.00595449		205119_s_at	FPR1	formyl peptide receptor 1	0.356843	0.00181885
212636_at	QKI	quaking homolog, KH domain RNA binding (mouse)	0.495638	0.0381791		207697_x_at	LILRB2	leukocyte immunoglobulin-like receptor, subfamily B (with TM and ITIM domains), member 2	0.418393	0.00609491		219049_at	CSGALNACT1	chondroitin sulfate N-acetylgalactosaminyltransferase 1	0.446777	0.00189818
224941_at	PAPPA	pregnancy-associated plasma protein A, pappalysin 1	0.391046	0.0383029		1553723_at	GPR97	G protein-coupled receptor 97	0.3733	0.00614239		230748_at	SLC16A6	solute carrier family 16, member 6 (monocarboxylic acid transporter 7)	0.464533	0.00194919
205159_at	CSF2RB	colony stimulating factor 2 receptor, beta, low-affinity (granulocyte-macrophage)	0.424584	0.0383029		229770_at	GLT1D1	glycosyltransferase 1 domain containing 1	0.496312	0.00614684		205863_at	S100A12	S100 calcium binding protein A12	0.198191	0.00200402
201617_x_at	CALD1	caldesmon 1	0.384697	0.0383029		229967_at	CMTM2	CKLF-like MARVEL transmembrane domain containing 2	0.267761	0.00614684		205922_at	VNN2	vanin 2	0.370521	0.00200402
203729_at	EMP3	epithelial membrane protein 3	0.476346	0.0383029		1555756_a_at	CLEC7A	C-type lectin domain family 7, member A	0.255303	0.00614684		207275_s_at	ACSL1	acyl-CoA synthetase long-chain family member 1	0.381279	0.00200613
209210_s_at	FERMT2	fermitin family homolog 2 (Drosophila)	0.429907	0.0383029		206522_at	MGAM /// LOC642103	maltase-glucoamylase (alpha-glucosidase) /// similar to Maltase-glucoamylase, intestinal	0.214488	0.00614684		202269_x_at	GBP1	guanylate binding protein 1, interferon-inducible, 67kDa	0.493235	0.00200795
202007_at	NID1	nidogen 1	0.396733	0.0383029		205863_at	S100A12	S100 calcium binding protein A12	0.0906001	0.00614684		209395_at	CHI3L1	chitinase 3-like 1 (cartilage glycoprotein-39)	0.298643	0.0020189
212262_at	QKI	quaking homolog, KH domain RNA binding (mouse)	0.491185	0.0388311		227129_x_at	tcag7.907	hypothetical LOC402483	0.484464	0.00619751		209396_s_at	CHI3L1	chitinase 3-like 1 (cartilage glycoprotein-39)	0.300349	0.00211047
202196_s_at	DKK3	dickkopf homolog 3 (Xenopus laevis)	0.461013	0.0394923		210146_x_at	LILRB2	leukocyte immunoglobulin-like receptor, subfamily B (with TM and ITIM domains), member 2	0.263128	0.00619751		210176_at	TLR1	toll-like receptor 1	0.411997	0.00225553
219159_s_at	SLAMF7	SLAM family member 7	0.396743	0.0403208		1554676_at	SRGN	serglycin	0.252295	0.00619751		217388_s_at	KYNU	kynureninase (L-kynurenine hydrolase)	0.450676	0.00225609
229947_at	PI15	peptidase inhibitor 15	0.135579	0.0418654		205681_at	BCL2A1	BCL2-related protein A1	0.184718	0.00619751		204422_s_at	FGF2	fibroblast growth factor 2 (basic)	0.443761	0.00225609
212397_at	RDX	radixin	0.474525	0.0418654		230748_at	SLC16A6	solute carrier family 16, member 6 (monocarboxylic acid transporter 7)	0.406367	0.00621063		204714_s_at	F5	coagulation factor V (proaccelerin, labile factor)	0.493388	0.00225609
215813_s_at	PTGS1	prostaglandin-endoperoxide synthase 1 (prostaglandin G/H synthase and cyclooxygenase)	0.484425	0.0427202		203561_at	FCGR2A	Fc fragment of IgG, low affinity IIa, receptor (CD32)	0.325382	0.00623981		204439_at	IFI44L	interferon-induced protein 44-like	0.477482	0.00234637
212956_at	TBC1D9	TBC1 domain family, member 9 (with GRAM domain)	0.362907	0.0427202		209278_s_at	TFPI2	tissue factor pathway inhibitor 2	0.146545	0.00634492		202498_s_at	SLC2A3	solute carrier family 2 (facilitated glucose transporter), member 3	0.400671	0.00240495
201426_s_at	VIM	vimentin	0.46242	0.0427202		202422_s_at	ACSL4	acyl-CoA synthetase long-chain family member 4	0.33064	0.00634492		215646_s_at	VCAN	versican	0.474136	0.00250876
226218_at	---	---	0.406357	0.0427202		203471_s_at	PLEK	pleckstrin	0.253408	0.00637166		220014_at	PRR16	proline rich 16	0.457463	0.00262108
214974_x_at	CXCL5	chemokine (C-X-C motif) ligand 5	0.231017	0.0429611		201531_at	ZFP36	zinc finger protein 36, C3H type, homolog (mouse)	0.442841	0.00637259		222088_s_at	SLC2A3 /// SLC2A14	solute carrier family 2 (facilitated glucose transporter), member 3 /// solute carrier family 2 (facilitated glucose transporter), member 14	0.407079	0.00273713
231766_s_at	COL12A1	collagen, type XII, alpha 1	0.27788	0.0431858		203708_at	PDE4B	phosphodiesterase 4B, cAMP-specific (phosphodiesterase E4 dunce homolog, Drosophila)	0.310619	0.00648918		229584_at	LRRK2	leucine-rich repeat kinase 2	0.499141	0.00275734
216557_x_at	IGHA1 /// IGHG1 /// IGHG3 /// IGHM /// IGHV@ /// IGHV4-31 /// LOC100133739	immunoglobulin heavy constant alpha 1 /// immunoglobulin heavy constant gamma 1 (G1m marker) /// immunoglobulin heavy constant gamma 3 (G3m marker) /// immunoglobulin heavy constant mu /// immunoglobulin heavy variable group /// immunoglobulin heavy variable 4-31 /// similar to hCG2038920	0.311606	0.0431858		203470_s_at	PLEK	pleckstrin	0.297381	0.00658395		206513_at	AIM2	absent in melanoma 2	0.483513	0.0028004
225688_s_at	PHLDB2	pleckstrin homology-like domain, family B, member 2	0.490661	0.0435242		210423_s_at	SLC11A1	solute carrier family 11 (proton-coupled divalent metal ion transporters), member 1	0.306351	0.00659911		231577_s_at	GBP1	guanylate binding protein 1, interferon-inducible, 67kDa	0.473594	0.00290727
226847_at	---	---	0.363102	0.0436384		207574_s_at	GADD45B	growth arrest and DNA-damage-inducible, beta	0.469481	0.0067226		212587_s_at	PTPRC	protein tyrosine phosphatase, receptor type, C	0.448624	0.00292496
201858_s_at	SRGN	serglycin	0.402009	0.0436384		232555_at	---	---	0.402757	0.00680133		203535_at	S100A9	S100 calcium binding protein A9	0.339585	0.00300912
230261_at	ST8SIA4	ST8 alpha-N-acetyl-neuraminide alpha-2,8-sialyltransferase 4	0.435824	0.0436384		208438_s_at	FGR	Gardner-Rasheed feline sarcoma viral (v-fgr) oncogene homolog	0.389224	0.00681089		202499_s_at	SLC2A3	solute carrier family 2 (facilitated glucose transporter), member 3	0.355773	0.00323916
231647_s_at	FCRL5	Fc receptor-like 5	0.325827	0.0436384		213418_at	HSPA6	heat shock 70kDa protein 6 (HSP70B')	0.309954	0.00684357		229625_at	GBP5	guanylate binding protein 5	0.459023	0.00324624
226517_at	BCAT1	branched chain aminotransferase 1, cytosolic	0.388822	0.0436384		209960_at	---	---	0.430331	0.00707404		204959_at	MNDA	myeloid cell nuclear differentiation antigen	0.281893	0.00324624
225464_at	FRMD6	FERM domain containing 6	0.491866	0.0436384		202388_at	RGS2	regulator of G-protein signaling 2, 24kDa	0.417285	0.00707404		212659_s_at	IL1RN	interleukin 1 receptor antagonist	0.476045	0.00326207
205207_at	IL6	interleukin 6 (interferon, beta 2)	0.217452	0.0436384		215078_at	SOD2	superoxide dismutase 2, mitochondrial	0.193236	0.00717744		206157_at	PTX3	pentraxin-related gene, rapidly induced by IL-1 beta	0.415898	0.00344808
230836_at	ST8SIA4	ST8 alpha-N-acetyl-neuraminide alpha-2,8-sialyltransferase 4	0.444062	0.0436384		213733_at	MYO1F	myosin IF	0.42141	0.00717744		210146_x_at	LILRB2	leukocyte immunoglobulin-like receptor, subfamily B (with TM and ITIM domains), member 2	0.363394	0.00352313
229437_at	MIRN155	microRNA 155	0.38623	0.0436384		209955_s_at	FAP	fibroblast activation protein, alpha	0.405192	0.00720304		210029_at	INDO	indoleamine-pyrrole 2,3 dioxygenase	0.397656	0.00376893
226142_at	GLIPR1	GLI pathogenesis-related 1 (glioma)	0.433778	0.0436654		209930_s_at	NFE2	nuclear factor (erythroid-derived 2), 45kDa	0.258356	0.00725693		210773_s_at	FPR2	formyl peptide receptor 2	0.387098	0.00379149
227697_at	SOCS3	suppressor of cytokine signaling 3	0.41254	0.0437699		231227_at	WNT5A	wingless-type MMTV integration site family, member 5A	0.394448	0.00725693		203591_s_at	CSF3R	colony stimulating factor 3 receptor (granulocyte)	0.366866	0.00379668
211641_x_at	IGH@ /// IGHA1 /// IGHA2 /// IGHG1 /// IGHG3 /// IGHM /// IGHV@ /// IGHV4-31 /// LOC100133739	immunoglobulin heavy locus /// immunoglobulin heavy constant alpha 1 /// immunoglobulin heavy constant alpha 2 (A2m marker) /// immunoglobulin heavy constant gamma 1 (G1m marker) /// immunoglobulin heavy constant gamma 3 (G3m marker) /// immunoglobulin heavy constant mu /// immunoglobulin heavy variable group /// immunoglobulin heavy variable 4-31 /// similar to hCG2038920	0.362903	0.0437699		211122_s_at	CXCL11	chemokine (C-X-C motif) ligand 11	0.210499	0.00730161		1554741_s_at	FGF7 /// KGFLP1 /// KGFLP2	fibroblast growth factor 7 (keratinocyte growth factor) /// keratinocyte growth factor-like protein 1 /// keratinocyte growth factor-like protein 2	0.410801	0.00383635
214085_x_at	GLIPR1	GLI pathogenesis-related 1 (glioma)	0.496129	0.0439255		1555167_s_at	NAMPT	nicotinamide phosphoribosyltransferase	0.320933	0.00730161		203470_s_at	PLEK	pleckstrin	0.455766	0.00403748
220122_at	MCTP1	multiple C2 domains, transmembrane 1	0.438455	0.0439255		203424_s_at	IGFBP5	insulin-like growth factor binding protein 5	0.343304	0.00730161		204475_at	MMP1	matrix metallopeptidase 1 (interstitial collagenase)	0.311371	0.00410274
217281_x_at	IGH@ /// IGHA1 /// IGHA2 /// IGHG1 /// IGHG2 /// IGHG3 /// IGHM /// IGHV4-31 /// LOC652494 /// LOC100126583 /// LOC100133739	immunoglobulin heavy locus /// immunoglobulin heavy constant alpha 1 /// immunoglobulin heavy constant alpha 2 (A2m marker) /// immunoglobulin heavy constant gamma 1 (G1m marker) /// immunoglobulin heavy constant gamma 2 (G2m marker) /// immunoglobulin heavy constant gamma 3 (G3m marker) /// immunoglobulin heavy constant mu /// immunoglobulin heavy variable 4-31 /// similar to Ig heavy chain V-II…	0.314003	0.0445498		210992_x_at	FCGR2C	Fc fragment of IgG, low affinity IIc, receptor for (CD32)	0.411359	0.00759736		204103_at	CCL4	chemokine (C-C motif) ligand 4	0.433007	0.00410274
204236_at	FLI1	Friend leukemia virus integration 1	0.438154	0.0445498		225899_x_at	tcag7.907 /// LOC643670 /// LOC728105	hypothetical LOC402483 /// similar to hCG1739109 /// similar to hCG1739109	0.421483	0.00770058		202391_at	BASP1	brain abundant, membrane attached signal protein 1	0.433675	0.00434047
229435_at	GLIS3	GLIS family zinc finger 3	0.411471	0.0445498		226757_at	IFIT2	interferon-induced protein with tetratricopeptide repeats 2	0.347216	0.00770058		206522_at	MGAM /// LOC642103	maltase-glucoamylase (alpha-glucosidase) /// similar to Maltase-glucoamylase, intestinal	0.394551	0.00434884
213429_at	BICC1	bicaudal C homolog 1 (Drosophila)	0.459207	0.0445498		202643_s_at	TNFAIP3	tumor necrosis factor, alpha-induced protein 3	0.422289	0.0077335		205681_at	BCL2A1	BCL2-related protein A1	0.311187	0.00434884
204748_at	PTGS2	prostaglandin-endoperoxide synthase 2 (prostaglandin G/H synthase and cyclooxygenase)	0.223	0.044659		203535_at	S100A9	S100 calcium binding protein A9	0.198873	0.00783295		225664_at	COL12A1	collagen, type XII, alpha 1	0.369835	0.00441213
202627_s_at	SERPINE1	serpin peptidase inhibitor, clade E (nexin, plasminogen activator inhibitor type 1), member 1	0.396399	0.0453506		217967_s_at	FAM129A	family with sequence similarity 129, member A	0.377589	0.00789822		220088_at	C5AR1	complement component 5a receptor 1	0.409771	0.00441374
226237_at	---	---	0.355405	0.0453506		215101_s_at	CXCL5	chemokine (C-X-C motif) ligand 5	0.0891728	0.0079099		203561_at	FCGR2A	Fc fragment of IgG, low affinity IIa, receptor (CD32)	0.431671	0.00449975
216598_s_at	CCL2	chemokine (C-C motif) ligand 2	0.327081	0.0453506		202859_x_at	IL8	interleukin 8	0.238694	0.00803376		214511_x_at	FCGR1B	Fc fragment of IgG, high affinity Ib, receptor (CD64)	0.432616	0.00449975
212764_at	ZEB1	zinc finger E-box binding homeobox 1	0.499681	0.0453506		202878_s_at	CD93	CD93 molecule	0.472277	0.00803376		223767_at	GPR84	G protein-coupled receptor 84	0.450735	0.00496691
229937_x_at	LILRB1	Leukocyte immunoglobulin-like receptor, subfamily B (with TM and ITIM domains), member 1	0.416785	0.0456034		203765_at	GCA	grancalcin, EF-hand calcium binding protein	0.360424	0.00803376		215838_at	LILRA5	leukocyte immunoglobulin-like receptor, subfamily A (with TM domain), member 5	0.495049	0.00509792
1554899_s_at	FCER1G	Fc fragment of IgE, high affinity I, receptor for; gamma polypeptide	0.421819	0.0456881		229404_at	TWIST2	twist homolog 2 (Drosophila)	0.406277	0.00808289		223809_at	RGS18	regulator of G-protein signaling 18	0.494861	0.0052301
210664_s_at	TFPI	tissue factor pathway inhibitor (lipoprotein-associated coagulation inhibitor)	0.497261	0.0456881		218404_at	SNX10	sorting nexin 10	0.478808	0.00808289		222326_at	---	---	0.395723	0.00526473
217966_s_at	FAM129A	family with sequence similarity 129, member A	0.469772	0.0456881		203435_s_at	MME	membrane metallo-endopeptidase	0.421643	0.00808289		216243_s_at	IL1RN	interleukin 1 receptor antagonist	0.417197	0.00526473
205269_at	LCP2	lymphocyte cytosolic protein 2 (SH2 domain containing leukocyte protein of 76kDa)	0.398583	0.0456881		215223_s_at	SOD2	superoxide dismutase 2, mitochondrial	0.331429	0.00845706		210423_s_at	SLC11A1	solute carrier family 11 (proton-coupled divalent metal ion transporters), member 1	0.48308	0.00532152
228167_at	KLHL6	kelch-like 6 (Drosophila)	0.336092	0.0457433		229435_at	GLIS3	GLIS family zinc finger 3	0.427631	0.00854423		203471_s_at	PLEK	pleckstrin	0.390398	0.00572082
216542_x_at	IGHA1 /// IGHG1 /// IGHV@	immunoglobulin heavy constant alpha 1 /// immunoglobulin heavy constant gamma 1 (G1m marker) /// immunoglobulin heavy variable group	0.415113	0.0458387		209821_at	IL33	interleukin 33	0.482785	0.00854423		204136_at	COL7A1	collagen, type VII, alpha 1 (epidermolysis bullosa, dystrophic, dominant and recessive)	0.488792	0.00621518
219279_at	DOCK10	dedicator of cytokinesis 10	0.483938	0.0458925		1552542_s_at	TAGAP	T-cell activation RhoGTPase activating protein	0.33459	0.00860728		204563_at	SELL	selectin L (lymphocyte adhesion molecule 1)	0.389367	0.00685973
204103_at	CCL4	chemokine (C-C motif) ligand 4	0.378082	0.0462284		224940_s_at	PAPPA	pregnancy-associated plasma protein A, pappalysin 1	0.392607	0.00860728		1555756_a_at	CLEC7A	C-type lectin domain family 7, member A	0.376022	0.00701414
202238_s_at	NNMT	nicotinamide N-methyltransferase	0.45309	0.0465341		232054_at	PCDH20	protocadherin 20	3.20807	0.00860728		209949_at	NCF2	neutrophil cytosolic factor 2 (65kDa, chronic granulomatous disease, autosomal 2)	0.450749	0.00741381
204688_at	SGCE	sarcoglycan, epsilon	0.493145	0.0468537		227491_at	ELOVL6	ELOVL family member 6, elongation of long chain fatty acids (FEN1/Elo2, SUR4/Elo3-like, yeast)	2.00878	0.00860728		209606_at	PSCDBP	pleckstrin homology, Sec7 and coiled-coil domains, binding protein	0.498859	0.00756388
214038_at	CCL8	chemokine (C-C motif) ligand 8	0.355499	0.0469731		235568_at	C19orf59	chromosome 19 open reading frame 59	0.22809	0.00860728		217967_s_at	FAM129A	family with sequence similarity 129, member A	0.449944	0.00801101
216365_x_at	IGL@ /// IGLV3-19	immunoglobulin lambda locus /// immunoglobulin lambda variable 3-19	0.42794	0.0471453		211302_s_at	PDE4B	phosphodiesterase 4B, cAMP-specific (phosphodiesterase E4 dunce homolog, Drosophila)	0.290936	0.00862166		209875_s_at	SPP1	secreted phosphoprotein 1 (osteopontin, bone sialoprotein I, early T-lymphocyte activation 1)	0.370147	0.00801101
209656_s_at	TMEM47	transmembrane protein 47	0.422984	0.0479185		1555962_at	B3GNT7	UDP-GlcNAc:betaGal beta-1,3-N-acetylglucosaminyltransferase 7	2.2441	0.00862166		200884_at	CKB	creatine kinase, brain	2.01117	0.00823927
211675_s_at	MDFIC	MyoD family inhibitor domain containing	0.484553	0.0479185		209695_at	PTP4A3 /// LOC100131062	protein tyrosine phosphatase type IVA, member 3 /// similar to protein tyrosine phosphatase type IVA, member 3	0.458976	0.00862166		228758_at	BCL6	B-cell CLL/lymphoma 6 (zinc finger protein 51)	0.491133	0.00829956
214973_x_at	IGHD	immunoglobulin heavy constant delta	0.310776	0.0479185		211958_at	IGFBP5	insulin-like growth factor binding protein 5	0.374839	0.00862166		214370_at	S100A8	S100 calcium binding protein A8	0.394665	0.00858717
209606_at	PSCDBP	pleckstrin homology, Sec7 and coiled-coil domains, binding protein	0.41551	0.0484018		214974_x_at	CXCL5	chemokine (C-X-C motif) ligand 5	0.0970303	0.0086712		204007_at	FCGR3B	Fc fragment of IgG, low affinity IIIb, receptor (CD16b)	0.33936	0.0086196
202760_s_at	PALM2-AKAP2	PALM2-AKAP2	0.499171	0.0487811		202628_s_at	SERPINE1	serpin peptidase inhibitor, clade E (nexin, plasminogen activator inhibitor type 1), member 1	0.341235	0.00885436		229937_x_at	LILRB1	Leukocyte immunoglobulin-like receptor, subfamily B (with TM and ITIM domains), member 1	0.486208	0.00874779
227239_at	FAM126A	family with sequence similarity 126, member A	0.491953	0.0487811		229584_at	LRRK2	leucine-rich repeat kinase 2	0.393126	0.00891131		226218_at	---	---	0.485195	0.00894592
206211_at	SELE	selectin E (endothelial adhesion molecule 1)	0.269748	0.0487811		229802_at	---	---	0.283676	0.00891131		226695_at	PRRX1	paired related homeobox 1	0.459183	0.00899796
202663_at	WIPF1	WAS/WASL interacting protein family, member 1	0.451953	0.0489414		202464_s_at	PFKFB3	6-phosphofructo-2-kinase/fructose-2,6-biphosphatase 3	0.450048	0.00892734		240287_at	IRG1	immunoresponsive 1 homolog (mouse)	0.449212	0.00926392
205569_at	LAMP3	lysosomal-associated membrane protein 3	0.499846	0.0489414		213596_at	CASP4	caspase 4, apoptosis-related cysteine peptidase	0.41596	0.00903668		202917_s_at	S100A8	S100 calcium binding protein A8	0.302276	0.00978053
215446_s_at	LOX	lysyl oxidase	0.413861	0.0489414		210118_s_at	IL1A	interleukin 1, alpha	0.266088	0.00935828		216236_s_at	SLC2A3 /// SLC2A14	solute carrier family 2 (facilitated glucose transporter), member 3 /// solute carrier family 2 (facilitated glucose transporter), member 14	0.442346	0.0113316
225285_at	BCAT1	branched chain aminotransferase 1, cytosolic	0.437875	0.0489414		202499_s_at	SLC2A3	solute carrier family 2 (facilitated glucose transporter), member 3	0.252071	0.00935828		1554676_at	SRGN	serglycin	0.469287	0.0118805
235061_at	PPM1K	protein phosphatase 1K (PP2C domain containing)	0.478959	0.0491959		224941_at	PAPPA	pregnancy-associated plasma protein A, pappalysin 1	0.429534	0.00952374		229967_at	CMTM2	CKLF-like MARVEL transmembrane domain containing 2	0.462428	0.0121926
224694_at	ANTXR1	anthrax toxin receptor 1	0.379334	0.0493527		206172_at	IL13RA2	interleukin 13 receptor, alpha 2	0.200296	0.00983552		201858_s_at	SRGN	serglycin	0.466384	0.012874
209683_at	---	---	0.441541	0.0495281		231879_at	COL12A1	collagen, type XII, alpha 1	0.430306	0.0102697		37145_at	GNLY	granulysin	0.474887	0.012976
						203574_at	NFIL3	nuclear factor, interleukin 3 regulated	0.476235	0.010327		237625_s_at	---	---	0.478604	0.0136587
						202497_x_at	SLC2A3	solute carrier family 2 (facilitated glucose transporter), member 3	0.313915	0.010327		209930_s_at	NFE2	nuclear factor (erythroid-derived 2), 45kDa	0.483528	0.0136587
						217497_at	TYMP	thymidine phosphorylase	0.421955	0.0104081		204006_s_at	FCGR3A /// FCGR3B	Fc fragment of IgG, low affinity IIIa, receptor (CD16a) /// Fc fragment of IgG, low affinity IIIb, receptor (CD16b)	0.329405	0.0138328
						236439_at	---	---	0.24916	0.0104081		221345_at	FFAR2	free fatty acid receptor 2	0.378857	0.0140045
						201645_at	TNC	tenascin C (hexabrachion)	0.318503	0.0104081		235568_at	C19orf59	chromosome 19 open reading frame 59	0.426187	0.0144684
						217739_s_at	NAMPT	nicotinamide phosphoribosyltransferase	0.432771	0.0104081		211163_s_at	TNFRSF10C	tumor necrosis factor receptor superfamily, member 10c, decoy without an intracellular domain	0.475658	0.0153796
						203083_at	THBS2	thrombospondin 2	0.362264	0.0104081		205237_at	FCN1	ficolin (collagen/fibrinogen domain containing) 1	0.442816	0.0161904
						226847_at	---	---	0.367747	0.0104081		209829_at	C6orf32	chromosome 6 open reading frame 32	0.434802	0.0169428
						226001_at	KLHL5	kelch-like 5 (Drosophila)	0.494689	0.0104081		1553297_a_at	CSF3R	colony stimulating factor 3 receptor (granulocyte)	0.47642	0.0188752
						219970_at	GIPC2	GIPC PDZ domain containing family, member 2	2.23173	0.0104081		235229_at	---	---	0.498825	0.019143
						206049_at	SELP	selectin P (granule membrane protein 140kDa, antigen CD62)	0.490765	0.0104081		202497_x_at	SLC2A3	solute carrier family 2 (facilitated glucose transporter), member 3	0.473607	0.0199623
						208092_s_at	FAM49A	family with sequence similarity 49, member A	0.475889	0.0107095		209125_at	KRT6A	keratin 6A	0.407412	0.0201119
						226237_at	---	---	0.319491	0.0107439		228167_at	KLHL6	kelch-like 6 (Drosophila)	0.485161	0.0204803
						238429_at	TMEM71	transmembrane protein 71	0.380045	0.0110623		210764_s_at	CYR61	cysteine-rich, angiogenic inducer, 61	0.467412	0.0212317
						236495_at	---	---	0.34967	0.0110623		203083_at	THBS2	thrombospondin 2	0.48528	0.0221249
						206420_at	IGSF6	immunoglobulin superfamily, member 6	0.345054	0.0112743		223969_s_at	RETNLB	resistin like beta	2.42259	0.0231161
						206953_s_at	LPHN2	latrophilin 2	0.446358	0.0112743		223970_at	RETNLB	resistin like beta	2.25141	0.0235523
						1555963_x_at	B3GNT7	UDP-GlcNAc:betaGal beta-1,3-N-acetylglucosaminyltransferase 7	2.6466	0.0116056		209792_s_at	KLK10	kallikrein-related peptidase 10	0.32318	0.0236565
						202391_at	BASP1	brain abundant, membrane attached signal protein 1	0.350761	0.0116278		205680_at	MMP10	matrix metallopeptidase 10 (stromelysin 2)	0.44101	0.0249208
						1554899_s_at	FCER1G	Fc fragment of IgE, high affinity I, receptor for; gamma polypeptide	0.391111	0.0116821		220330_s_at	SAMSN1	SAM domain, SH3 domain and nuclear localization signals 1	0.475913	0.0250358
						221477_s_at	MGC5618	hypothetical protein MGC5618	0.479729	0.0117129		218002_s_at	CXCL14	chemokine (C-X-C motif) ligand 14	2.06281	0.026024
						209875_s_at	SPP1	secreted phosphoprotein 1 (osteopontin, bone sialoprotein I, early T-lymphocyte activation 1)	0.296741	0.0117473		204602_at	DKK1	dickkopf homolog 1 (Xenopus laevis)	0.450841	0.0265484
						206707_x_at	C6orf32	chromosome 6 open reading frame 32	0.443818	0.0119693		222529_at	SLC25A37	solute carrier family 25, member 37	0.488998	0.0286996
						207442_at	CSF3	colony stimulating factor 3 (granulocyte)	0.401375	0.0122693		201289_at	CYR61	cysteine-rich, angiogenic inducer, 61	0.471542	0.0291361
						225681_at	CTHRC1	collagen triple helix repeat containing 1	0.316746	0.0123504		205269_at	LCP2	lymphocyte cytosolic protein 2 (SH2 domain containing leukocyte protein of 76kDa)	0.497189	0.0294127
						206574_s_at	PTP4A3 /// LOC100131062	protein tyrosine phosphatase type IVA, member 3 /// similar to protein tyrosine phosphatase type IVA, member 3	0.456073	0.0126176		202988_s_at	RGS1	regulator of G-protein signaling 1	0.47964	0.0320396
						204563_at	SELL	selectin L (lymphocyte adhesion molecule 1)	0.276682	0.0126954		214038_at	CCL8	chemokine (C-C motif) ligand 8	0.48436	0.0320396
						220014_at	PRR16	proline rich 16	0.41666	0.0128256		1555638_a_at	SAMSN1	SAM domain, SH3 domain and nuclear localization signals 1	0.487417	0.0322373
						242907_at	---	---	0.44811	0.0128501		204533_at	CXCL10	chemokine (C-X-C motif) ligand 10	0.496234	0.0336405
						208018_s_at	HCK	hemopoietic cell kinase	0.389658	0.0128501		213680_at	KRT6B	keratin 6B	0.447766	0.0373014
						211395_x_at	FCGR2C	Fc fragment of IgG, low affinity IIc, receptor for (CD32)	0.440234	0.0128501		231647_s_at	FCRL5	Fc receptor-like 5	0.475061	0.0383097
						220122_at	MCTP1	multiple C2 domains, transmembrane 1	0.473572	0.0129693		209795_at	CD69	CD69 molecule	0.469795	0.0442058
						204714_s_at	F5	coagulation factor V (proaccelerin, labile factor)	0.396338	0.0129693		207080_s_at	PYY	peptide YY	2.07718	0.0444876
						210176_at	TLR1	toll-like receptor 1	0.316804	0.0131093
						236203_at	HLA-DQA1	major histocompatibility complex, class II, DQ alpha 1	0.253532	0.013162
						202627_s_at	SERPINE1	serpin peptidase inhibitor, clade E (nexin, plasminogen activator inhibitor type 1), member 1	0.37617	0.013162
						221698_s_at	CLEC7A	C-type lectin domain family 7, member A	0.416466	0.013162
						219049_at	CSGALNACT1	chondroitin sulfate N-acetylgalactosaminyltransferase 1	0.389977	0.0131816
						219183_s_at	PSCD4	pleckstrin homology, Sec7 and coiled-coil domains 4	0.463204	0.0131816
						213435_at	SATB2	SATB homeobox 2	2.43271	0.0133852
						219304_s_at	PDGFD	platelet derived growth factor D	2.12127	0.0133852
						206515_at	CYP4F3	cytochrome P450, family 4, subfamily F, polypeptide 3	0.375464	0.013402
						224909_s_at	PREX1	phosphatidylinositol 3,4,5-trisphosphate-dependent RAC exchanger 1	0.482775	0.0135989
						222088_s_at	SLC2A3 /// SLC2A14	solute carrier family 2 (facilitated glucose transporter), member 3 /// solute carrier family 2 (facilitated glucose transporter), member 14	0.306889	0.013732
						202637_s_at	ICAM1	intercellular adhesion molecule 1 (CD54), human rhinovirus receptor	0.487693	0.013732
						221920_s_at	SLC25A37	solute carrier family 25, member 37	0.43348	0.013732
						231766_s_at	COL12A1	collagen, type XII, alpha 1	0.392665	0.013732
						216236_s_at	SLC2A3 /// SLC2A14	solute carrier family 2 (facilitated glucose transporter), member 3 /// solute carrier family 2 (facilitated glucose transporter), member 14	0.303292	0.013732
						217312_s_at	COL7A1	collagen, type VII, alpha 1 (epidermolysis bullosa, dystrophic, dominant and recessive)	0.370555	0.0137576
						205767_at	EREG	epiregulin	0.276597	0.0139747
						207610_s_at	EMR2	egf-like module containing, mucin-like, hormone receptor-like 2	0.371113	0.014173
						214604_at	HOXD11	homeobox D11	2.00783	0.014336
						205098_at	CCR1	chemokine (C-C motif) receptor 1	0.403686	0.014336
						222326_at	---	---	0.265612	0.0144366
						217966_s_at	FAM129A	family with sequence similarity 129, member A	0.438057	0.0145201
						210184_at	ITGAX	integrin, alpha X (complement component 3 receptor 4 subunit)	0.447696	0.0145294
						215990_s_at	BCL6	B-cell CLL/lymphoma 6 (zinc finger protein 51)	0.424959	0.0145674
						205099_s_at	CCR1	chemokine (C-C motif) receptor 1	0.390232	0.0146923
						216841_s_at	SOD2	superoxide dismutase 2, mitochondrial	0.427526	0.0146923
						242388_x_at	---	---	0.372147	0.0146923
						204575_s_at	MMP19	matrix metallopeptidase 19	0.454064	0.0146923
						231274_s_at	SLC25A37	Solute carrier family 25, member 37	0.447245	0.0146923
						209683_at	---	---	0.470327	0.0146923
						217738_at	NAMPT	nicotinamide phosphoribosyltransferase	0.430795	0.0151413
						208594_x_at	LILRA6	leukocyte immunoglobulin-like receptor, subfamily A (with TM domain), member 6	0.42785	0.0152595
						207080_s_at	PYY	peptide YY	3.28336	0.0155725
						229625_at	GBP5	guanylate binding protein 5	0.36992	0.015634
						229450_at	IFIT3	interferon-induced protein with tetratricopeptide repeats 3	0.37911	0.0159645
						203697_at	FRZB	frizzled-related protein	2.05298	0.0160702
						240038_at	---	---	0.473498	0.0161219
						205159_at	CSF2RB	colony stimulating factor 2 receptor, beta, low-affinity (granulocyte-macrophage)	0.420654	0.0161219
						209792_s_at	KLK10	kallikrein-related peptidase 10	0.210111	0.0163487
						202888_s_at	ANPEP	alanyl (membrane) aminopeptidase (aminopeptidase N, aminopeptidase M, microsomal aminopeptidase, CD13, p150)	0.340989	0.0165504
						204422_s_at	FGF2	fibroblast growth factor 2 (basic)	0.393645	0.0166567
						218002_s_at	CXCL14	chemokine (C-X-C motif) ligand 14	2.4379	0.0166853
						223767_at	GPR84	G protein-coupled receptor 84	0.323181	0.0168756
						236681_at	HOXD13	homeobox D13	2.02797	0.0168756
						228153_at	RNF144B	ring finger 144B	0.459294	0.0170966
						222484_s_at	CXCL14	chemokine (C-X-C motif) ligand 14	2.15554	0.0181584
						202917_s_at	S100A8	S100 calcium binding protein A8	0.183103	0.0185759
						212999_x_at	HLA-DQB1 /// HLA-DQB2 /// HLA-DRB1 /// HLA-DRB2 /// HLA-DRB3 /// HLA-DRB4 /// HLA-DRB5 /// RNASE2 /// ZNF749 /// LOC730415 /// hCG_1998957 /// LOC100133484 /// LOC100133583 /// LOC100133661 /// LOC100133811	major histocompatibility complex, class II, DQ beta 1 /// major histocompatibility complex, class II, DQ beta 2 /// major histocompatibility complex, class II, DR beta 1 /// major histocompatibility complex, class II, DR beta 2 (pseudogene) /// major histocompatibility complex, class II, DR beta 3 /// major histocompatibility complex, class II, DR beta 4 /// major histocompatibility complex, clas…	0.327593	0.0187181
						205828_at	MMP3	matrix metallopeptidase 3 (stromelysin 1, progelatinase)	0.296757	0.0188001
						209829_at	C6orf32	chromosome 6 open reading frame 32	0.332046	0.019211
						203434_s_at	MME	membrane metallo-endopeptidase	0.39273	0.0193061
						231513_at	---	---	0.412845	0.0194236
						215838_at	LILRA5	leukocyte immunoglobulin-like receptor, subfamily A (with TM domain), member 5	0.377246	0.019471
						202498_s_at	SLC2A3	solute carrier family 2 (facilitated glucose transporter), member 3	0.312021	0.0198036
						225664_at	COL12A1	collagen, type XII, alpha 1	0.366824	0.0200647
						223122_s_at	SFRP2	secreted frizzled-related protein 2	0.418855	0.0202396
						223809_at	RGS18	regulator of G-protein signaling 18	0.41409	0.0205947
						204174_at	ALOX5AP	arachidonate 5-lipoxygenase-activating protein	0.397462	0.0206679
						209728_at	HLA-DRB4	major histocompatibility complex, class II, DR beta 4	4.00713	0.0206926
						210029_at	INDO	indoleamine-pyrrole 2,3 dioxygenase	0.309289	0.0210293
						221874_at	KIAA1324	KIAA1324	2.17127	0.0211508
						204733_at	KLK6	kallikrein-related peptidase 6	0.478614	0.0211508
						227152_at	C12orf35	chromosome 12 open reading frame 35	0.416656	0.0211582
						206765_at	KCNJ2	potassium inwardly-rectifying channel, subfamily J, member 2	0.444207	0.0211582
						204103_at	CCL4	chemokine (C-C motif) ligand 4	0.389982	0.0211693
						204136_at	COL7A1	collagen, type VII, alpha 1 (epidermolysis bullosa, dystrophic, dominant and recessive)	0.390717	0.0211693
						217388_s_at	KYNU	kynureninase (L-kynurenine hydrolase)	0.346604	0.0211693
						226695_at	PRRX1	paired related homeobox 1	0.444047	0.0214986
						213831_at	HLA-DQA1	major histocompatibility complex, class II, DQ alpha 1	0.152878	0.0228866
						242335_at	SLC25A37	solute carrier family 25, member 37	0.492598	0.023055
						205786_s_at	ITGAM	integrin, alpha M (complement component 3 receptor 3 subunit)	0.420231	0.0230801
						223551_at	PKIB	protein kinase (cAMP-dependent, catalytic) inhibitor beta	3.14895	0.0230801
						204256_at	ELOVL6	ELOVL family member 6, elongation of long chain fatty acids (FEN1/Elo2, SUR4/Elo3-like, yeast)	2.11406	0.0231821
						223553_s_at	DOK3	docking protein 3	0.408678	0.0233536
						207677_s_at	NCF4	neutrophil cytosolic factor 4, 40kDa	0.492363	0.0234905
						209071_s_at	RGS5	regulator of G-protein signaling 5	0.494	0.0244392
						204439_at	IFI44L	interferon-induced protein 44-like	0.478793	0.0249165
						221060_s_at	TLR4	toll-like receptor 4	0.466547	0.0249165
						209844_at	HOXB13	homeobox B13	2.03706	0.0249165
						1557418_at	---	---	0.496333	0.0251844
						223502_s_at	TNFSF13B	tumor necrosis factor (ligand) superfamily, member 13b	0.437695	0.0251844
						205798_at	IL7R	interleukin 7 receptor	0.48972	0.0258112
						205270_s_at	LCP2	lymphocyte cytosolic protein 2 (SH2 domain containing leukocyte protein of 76kDa)	0.40596	0.02628
						207571_x_at	C1orf38	chromosome 1 open reading frame 38	0.489202	0.02628
						226777_at	---	---	0.488132	0.026665
						209480_at	HLA-DQB1	major histocompatibility complex, class II, DQ beta 1	0.149048	0.026665
						226388_at	TCEA3	transcription elongation factor A (SII), 3	2.27829	0.026665
						228128_x_at	PAPPA	pregnancy-associated plasma protein A, pappalysin 1	0.381898	0.026665
						210868_s_at	ELOVL6	ELOVL family member 6, elongation of long chain fatty acids (FEN1/Elo2, SUR4/Elo3-like, yeast)	2.26311	0.0269968
						231577_s_at	GBP1	guanylate binding protein 1, interferon-inducible, 67kDa	0.440086	0.0272057
						229937_x_at	LILRB1	Leukocyte immunoglobulin-like receptor, subfamily B (with TM and ITIM domains), member 1	0.436394	0.0272057
						202269_x_at	GBP1	guanylate binding protein 1, interferon-inducible, 67kDa	0.447512	0.0279229
						210785_s_at	C1orf38	chromosome 1 open reading frame 38	0.479681	0.0281183
						206262_at	ADH1C	alcohol dehydrogenase 1C (class I), gamma polypeptide	2.96359	0.0281183
						1555638_a_at	SAMSN1	SAM domain, SH3 domain and nuclear localization signals 1	0.392986	0.0286555
						227654_at	C20orf175	chromosome 20 open reading frame 175	0.481313	0.0287468
						206387_at	CDX2	caudal type homeobox 2	2.01009	0.0287468
						204614_at	SERPINB2	serpin peptidase inhibitor, clade B (ovalbumin), member 2	0.480215	0.0287468
						215783_s_at	ALPL	alkaline phosphatase, liver/bone/kidney	0.370411	0.0287745
						230244_at	UNQ830	ASCL830	2.05486	0.0289718
						206513_at	AIM2	absent in melanoma 2	0.474241	0.0289718
						1554741_s_at	FGF7 /// KGFLP1 /// KGFLP2	fibroblast growth factor 7 (keratinocyte growth factor) /// keratinocyte growth factor-like protein 1 /// keratinocyte growth factor-like protein 2	0.383494	0.0298192
						211959_at	IGFBP5	insulin-like growth factor binding protein 5	0.427545	0.0300102
						238063_at	TMEM154	transmembrane protein 154	0.477633	0.030341
						232297_at	---	---	0.49168	0.0310288
						213456_at	SOSTDC1	sclerostin domain containing 1	2.44679	0.0311208
						213929_at	---	---	2.24052	0.0314409
						214467_at	GPR65	G protein-coupled receptor 65	0.457053	0.0321025
						205259_at	NR3C2	nuclear receptor subfamily 3, group C, member 2	2.06475	0.032741
						203892_at	WFDC2	WAP four-disulfide core domain 2	2.31432	0.0329003
						235147_at	---	---	2.01671	0.0333126
						205269_at	LCP2	lymphocyte cytosolic protein 2 (SH2 domain containing leukocyte protein of 76kDa)	0.421578	0.0333126
						219454_at	EGFL6	EGF-like-domain, multiple 6	0.491062	0.0348891
						219947_at	CLEC4A	C-type lectin domain family 4, member A	0.438442	0.0353406
						206584_at	LY96	lymphocyte antigen 96	0.461337	0.0361741
						212587_s_at	PTPRC	protein tyrosine phosphatase, receptor type, C	0.402827	0.0362188
						227736_at	C10orf99	chromosome 10 open reading frame 99	3.44568	0.0371403
						204951_at	RHOH	ras homolog gene family, member H	0.465801	0.0375508
						210140_at	CST7	cystatin F (leukocystatin)	0.46085	0.0375508
						223987_at	CHRDL2	chordin-like 2	0.484713	0.0378682
						202638_s_at	ICAM1	intercellular adhesion molecule 1 (CD54), human rhinovirus receptor	0.462728	0.0387679
						223501_at	TNFSF13B	tumor necrosis factor (ligand) superfamily, member 13b	0.476563	0.0394076
						230925_at	APBB1IP	amyloid beta (A4) precursor protein-binding, family B, member 1 interacting protein	0.463196	0.0396032
						203895_at	PLCB4	phospholipase C, beta 4	2.17457	0.0410939
						227404_s_at	EGR1	Early growth response 1	0.483627	0.0416717
						205495_s_at	GNLY	granulysin	0.405826	0.041761
						242946_at	CD53	CD53 molecule	0.463246	0.0419964
						226974_at	---	---	2.27908	0.0428596
						206336_at	CXCL6	chemokine (C-X-C motif) ligand 6 (granulocyte chemotactic protein 2)	0.252741	0.0431263
						206157_at	PTX3	pentraxin-related gene, rapidly induced by IL-1 beta	0.374959	0.0434944
						1553828_at	FAM55A	family with sequence similarity 55, member A	2.18338	0.0436183
						227458_at	---	---	0.434247	0.0442035
						220330_s_at	SAMSN1	SAM domain, SH3 domain and nuclear localization signals 1	0.428758	0.044764
						204475_at	MMP1	matrix metallopeptidase 1 (interstitial collagenase)	0.317529	0.0448192
						229254_at	MFSD4	major facilitator superfamily domain containing 4	2.78558	0.0448272
						37145_at	GNLY	granulysin	0.383649	0.0450757
						226517_at	BCAT1	branched chain aminotransferase 1, cytosolic	0.474443	0.045165
						244313_at	CR1	complement component (3b/4b) receptor 1 (Knops blood group)	0.41482	0.045266
						227725_at	ST6GALNAC1	ST6 (alpha-N-acetyl-neuraminyl-2,3-beta-galactosyl-1,3)-N-acetylgalactosaminide alpha-2,6-sialyltransferase 1	2.0545	0.045941
						209116_x_at	HBB	hemoglobin, beta	0.351959	0.0461849
						211795_s_at	FYB	FYN binding protein (FYB-120/130)	0.464881	0.0463691
						213817_at	---	---	0.484881	0.0473717
						240287_at	IRG1	immunoresponsive 1 homolog (mouse)	0.427313	0.0480357
						226218_at	---	---	0.459841	0.0480357
						227735_s_at	C10orf99	chromosome 10 open reading frame 99	3.56298	0.0481111
						211696_x_at	HBB	hemoglobin, beta	0.396745	0.0482246
						204860_s_at	NAIP /// LOC652755	NLR family, apoptosis inhibitory protein /// similar to Baculoviral IAP repeat-containing protein 1 (Neuronal apoptosis inhibitory protein)	0.490621	0.0482261
						220645_at	FAM55D	family with sequence similarity 55, member D	2.28155	0.0482405
						237521_x_at	---	---	2.18376	0.0486486
